# Supplementary material for: Long-term variation of sea ice and its response to thermodynamic factors in the Northwest Passage of the Canadian Arctic Archipelago
Source: Copernicus journal article supplement (doi:10.5194/tc-2020-215), 2020-08-17
Supplement: Supplementary file [file tc-2020-215-AC1-supplement.pdf]

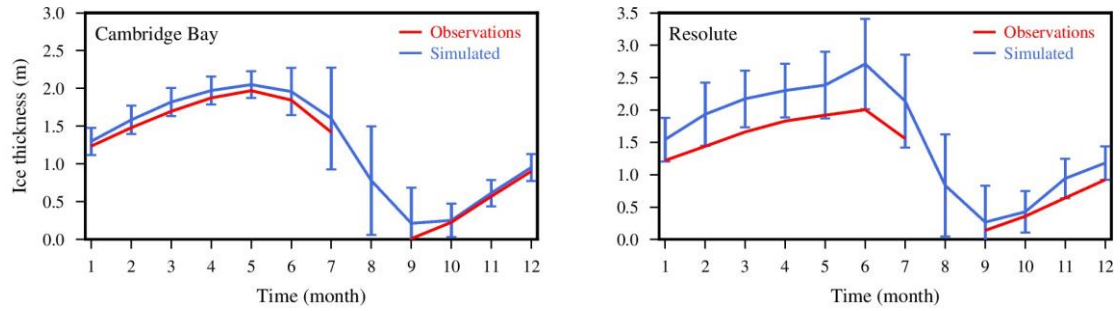

**Figure 1. Seasonal variability of the sea ice thickness from CIS (red curve) and AO-FVCOM (blue curves) over the period 1979–2017.**

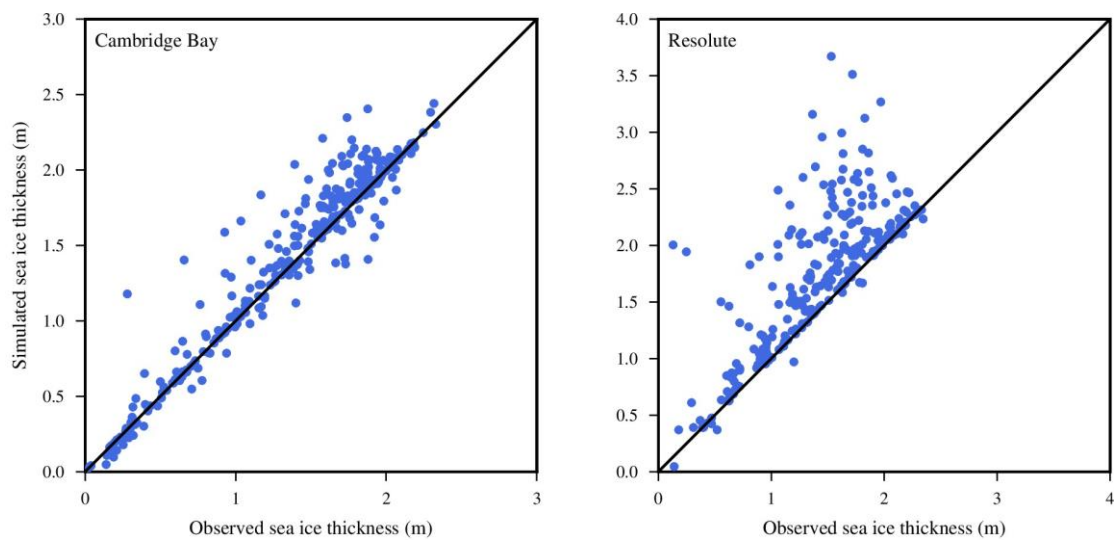

**Figure 2. Comparison of AO-FVCOM sea ice thickness with sea ice thickness observations over the period 1979–2017.**

**Table 1. Mean sea ice thickness, trend and maximum sea ice thickness trend of observations and AO-FVCOM in the Cambridge Bay and Resolute, and mean absolute differences, correlation coefficient, RMSE between observations and AO-FVCOM.**

|                                            | Cambridge Bay |               | Resolute      |              |
|--------------------------------------------|---------------|---------------|---------------|--------------|
|                                            | Observations  | Simulation    | Observations  | Simulation   |
| Mean sea ice thickness (m)                 | 1.32          | 1.38          | 1.41          | 1.73         |
| Trend of sea ice thickness (m/10a)         | -0.07(p<0.05) | -0.12(p<0.01) | 0.03          | 0.00         |
| Trend of maximum sea ice thickness (m/10a) | -0.07(p<0.05) | -0.12(p<0.01) | -0.07(p<0.05) | -0.06        |
| Mean absolute differences (m)              |               | 0.10          |               | 0.33         |
| Correlation coefficient                    |               | 0.96(p<0.01)  |               | 0.77(p<0.01) |
| RMSE (m)                                   |               | 0.18          |               | 0.52         |
